# Supplementary material for: Single-Cell Profiling of the Immune Atlas of Tumor-Infiltrating Lymphocytes in Endometrial Carcinoma
Source: MDPI journal article supplement (doi:10.3390/cancers14174311), 2022-09-02
Supplement: s1 [file s1]

**Table S1 Antibodies Used for Mass Cytometry**

| Medal             | Antigen       | Medal             | Antigen       |
|-------------------|---------------|-------------------|---------------|
| <sup>197</sup> Au | CD4           | <sup>142</sup> Nd | TCRgd         |
| <sup>209</sup> Bi | CD45RA        | <sup>143</sup> Nd | CD184 (CXCR4) |
| <sup>161</sup> Dy | CD152 (CTLA4) | <sup>144</sup> Nd | CD134 (OX40)  |
| <sup>162</sup> Dy | Foxp3         | <sup>145</sup> Nd | CD103 (ITGAE) |
| <sup>163</sup> Dy | CD137 (4-1BB) | <sup>146</sup> Nd | CD49d (ITGA4) |
| <sup>164</sup> Dy | RORyt         | <sup>148</sup> Nd | CD185 (CXCR5) |
| <sup>166</sup> Er | perforin      | <sup>150</sup> Nd | RUNX3         |
| <sup>167</sup> Er | KLRG1         | <sup>141</sup> Pr | CD56          |
| <sup>168</sup> Er | T-bet         | <sup>198</sup> Pt | CD8a          |
| <sup>170</sup> Er | CD366 (Tim-3) | <sup>147</sup> Sm | CD197 (CCR7)  |
| <sup>151</sup> Eu | CD45RO        | <sup>149</sup> Sm | CD279 (PD-1)  |
| <sup>153</sup> Eu | CD69          | <sup>152</sup> Sm | CD223 (LAG3)  |
| <sup>155</sup> Gd | CD49a (ITGA1) | <sup>154</sup> Sm | TIGIT         |
| <sup>156</sup> Gd | Hobit         | <sup>159</sup> Tb | CD357 (GITR)  |
| <sup>157</sup> Gd | CD183 (CXCR3) | <sup>169</sup> Tm | Ki67          |
| <sup>158</sup> Gd | BCL6          | <sup>89</sup> Y   | CD45          |
| <sup>160</sup> Gd | CD186 (CXCR6) | <sup>171</sup> Yb | GATA-3        |
| <sup>165</sup> Ho | CD278 (ICOS)  | <sup>172</sup> Yb | Eomes         |
| <sup>115</sup> In | CD3           | <sup>173</sup> Yb | Granzyme B    |
| <sup>139</sup> La | CD44          | <sup>174</sup> Yb | CD252 (OX40L) |
| <sup>175</sup> Lu | CD16          | <sup>176</sup> Yb | Blimp-1       |
