# Supplementary material for: Single-Cell Profiling of the Immune Atlas of Tumor-Infiltrating Lymphocytes in Endometrial Carcinoma
Source: Cancers (Basel). 2022 Sep 2;14(17):4311. doi: 10.3390/cancers14174311 (PMC9455014; doi:10.3390/cancers14174311)
Supplement: Supplementary file 1 [file cancers-14-04311-s001.zip]

Archive with 5 entries (5 files):
- Fig S1.jpg
- Fig S2.jpg
- Fig S3.jpg
- Supplement figure captions_2022_4_28 1.pdf
- Supplementary Table S1 Antibodies Used for Mass Cytometry.pdf
